# Supplementary material
Source: Springer Nature journal article supplement (https://www.springermedizin.de/resource/supplementary/11689_2012_35_MOESM3_ESM.pdf/9673158)

FACES

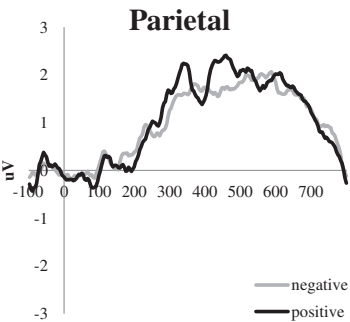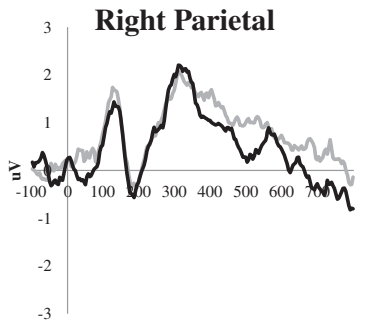

INVERTED FACES

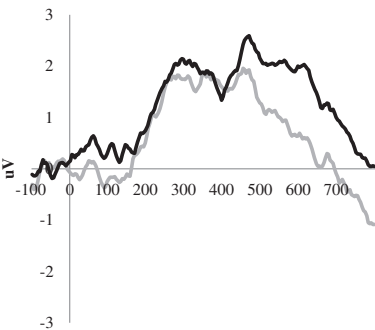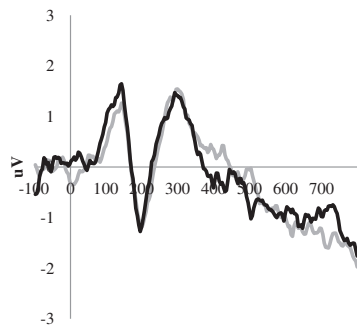

OBJECTS

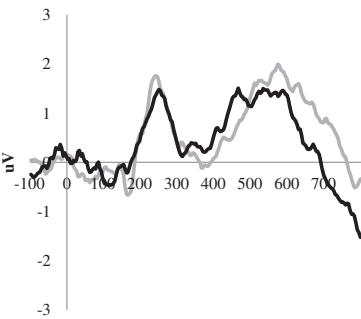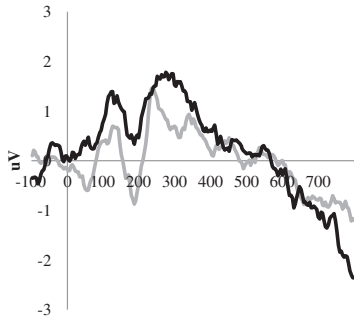

Supplement: MOESM3 [file 9673158]
